# Supplementary material for: Effect of Methotrexate in the Treatment of Distal Interphalangeal Joint Extensor Tendon Enthesopathy in Patients with Nail Psoriasis
Source: MDPI journal article supplement (doi:10.3390/jcm7120546), 2018-12-14
Supplement: s1 [file s1]

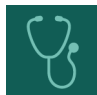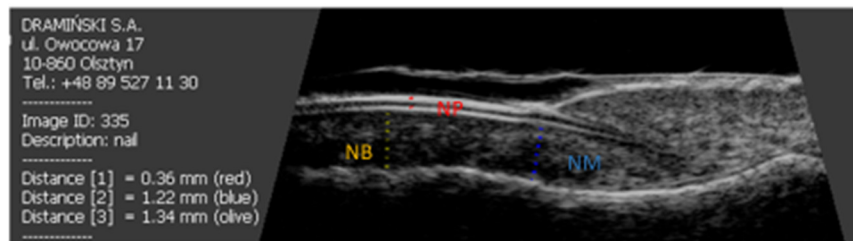

**Figure S1.** Nail of a healthy person. NP: nail plate; NB: nail bed; NM: nail matrix.

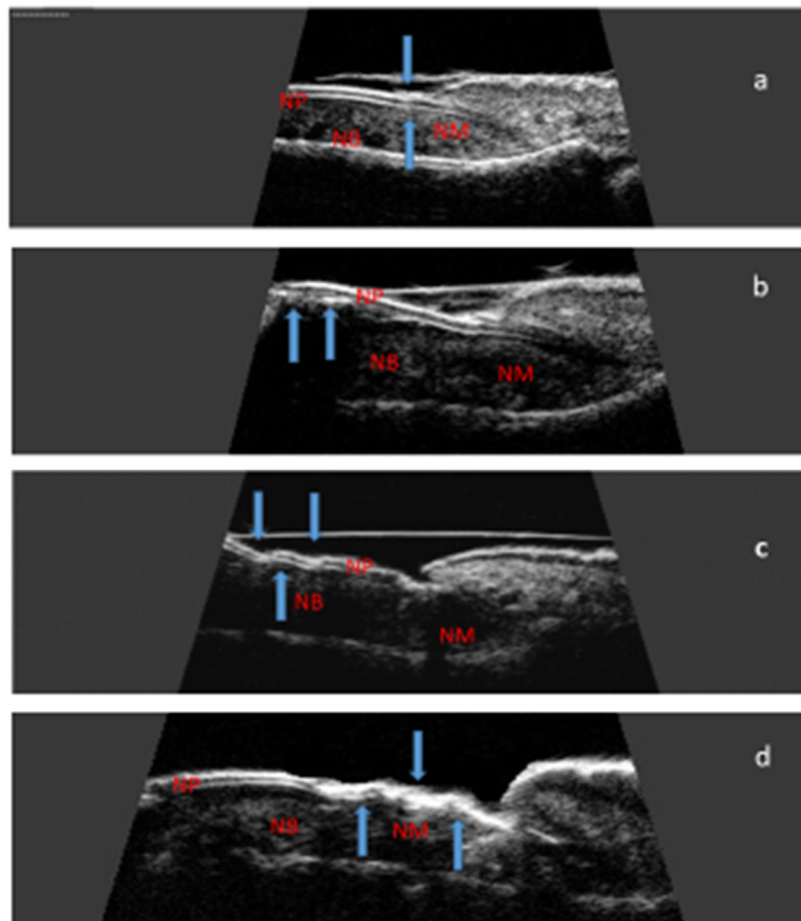

**Figure S2.** Longitudinal scan of psoriatic nail. (a) Focal hyperechoic involvement of the ventral plate, (b) Loosening of the borders of the ventral plate, (c) Wavy plates. d Loss of definition of both plates. NP: nail plate; NB: nail bed; NM: nail matrix.

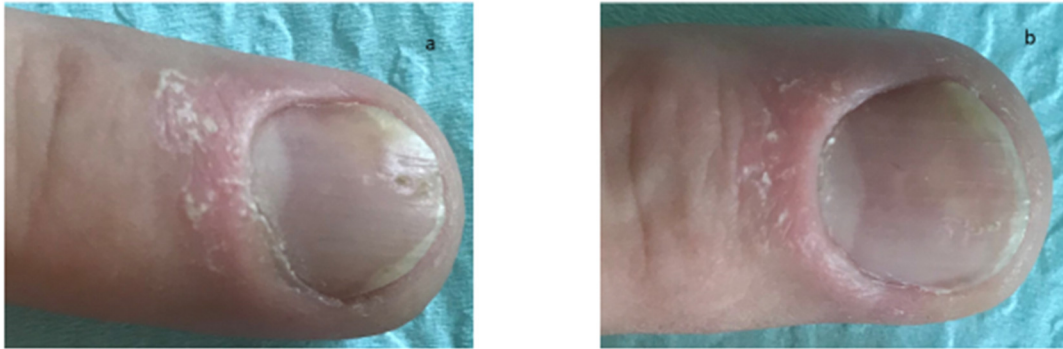

**Figure S3.** The effect of six months of methotrexate treatment on the clinical improvement of nail psoriasis. (a) before treatment, (b) after 6 months of treatment with methotrexate.
